# Supplementary material for: In Silico Analysis Identifies Upregulated lncRNA DLGAP1-AS1 Which Is Correlated to Poor Prognosis and Promotes Cell Proliferation in Glioblastoma
Source: PubMed Central journal article supplement (PMC8941517; doi:10.1155/2022/5038124), 2022-03-15
Supplement: 5038124.f1.pdf [file 5038124.f1.pdf]

| <b>primers</b> |                     |                         |                      |
|----------------|---------------------|-------------------------|----------------------|
| <b>gene</b>    | <b>primer label</b> | <b>primer sequence</b>  | <b>primer length</b> |
| ATG4A          | Forward             | TGCTGGTTGGGGATGTATGC    | 20                   |
|                | Reverse             | GCGTTGGTATTCTTTGGGTTGT  | 22                   |
| ATG10          | Forward             | AGACCATCAAAGGACTGTTCTGA | 23                   |
|                | Reverse             | GGGTAGATGCTCCTAGATGTGAC | 23                   |
| MED7           | Forward             | ATCCGCCCTTTGGAAAGTCAG   | 21                   |
|                | Reverse             | TGGTGGGGTTCGGTATTCATTT  | 21                   |
| MED11          | Forward             | TGGCGAACGAGAGACTACG     | 19                   |
|                | Reverse             | ACAGTACCTGCATTCTGAAGGAT | 23                   |
| TOMM7          | Forward             | CATTCGCTGGGGCTTTATCC    | 20                   |
|                | Reverse             | TCTGCACCCCTCTTAAATCCC   | 21                   |
| ATP5H          | Forward             | GCTGGGCGAAAACCTTGCTCTA  | 21                   |
|                | Reverse             | CCAGTCGATAGCTGGTGGATT   | 21                   |
| MPRL27         | Forward             | CGGACAGCCGTTACATCCTTG   | 21                   |
|                | Reverse             | CTACCACCCGACTTCTTGGA    | 20                   |
| IFT20          | Forward             | AGCAGACCATAGAGCTGAAGG   | 21                   |
|                | Reverse             | AGCACCGATGGCCTGTAGT     | 19                   |
| TCTN1          | Forward             | TGTTTCAGTCCATCGTCATTCAG | 22                   |
|                | Reverse             | GCAAAGGCTAAAGTGTCCAGC   | 21                   |
| B9D1           | Forward             | TGGAGGAGGGGATCTCACAG    | 20                   |
|                | Reverse             | CCGTAGGGGTTGGTGCTTTT    | 20                   |
| human b-actin  | Forward             | AAGGTGACAGCAGTCGGTT     | 19                   |
|                | Reverse             | TGTGTGGACTTGGGAGAGG     | 19                   |
| DLGAP1-AS1     | Forward             | GGGGCAGGAGTAAAGTGGAC    | 20                   |
|                | Reverse             | GGGGCAGGAGTAAAGTGGAC    | 20                   |

| <b>siRNAs</b> |              |                           |
|---------------|--------------|---------------------------|
| <b>gene</b>   | <b>siRNA</b> | <b>siRNA sequence</b>     |
| ATG4A         | siRNA-1      | CAGATACAGATGAGCTGGTATGGAT |
|               | siRNA-2      | CATCCTAAACCTGGATCCTTCAGTT |
| DLGAP1-AS1    | siRNA-1      | GGGATGAGAAGAGACTTCCTGGAGA |
|               | siRNA-2      | CATGATCTAGCAGGCCAAATCCTAA |
| NC            | siRNA-1      | UUCUCCGAACGUGUCACGUTT     |

**Table S1. The sequence of the primers and siRNAs used in this study.**
